# Supplementary material
Source: publisher figshare collection journal article supplement (https://frontiersin.figshare.com/ndownloader/files/13084208)
Supplement: Supplementary file [file 13084208]

## *Supplementary Material*

### **Context-sensitivity and Individual Differences in the Derivation of Scalar Implicature**

**Xiao Yang\***, Utako Minai, Robert Fiorentino

\* **Correspondence:** Xiao Yang: xiaoyang@ku.edu

#### Supplementary Tables

Table 1: A summary of trial types and properties in the main story-sentence matching task.

|         | No. of trials | QUD                                                            | Quantifier in the target utterance | No. of objects changed in the picture | Felicity and truth value |
|---------|---------------|----------------------------------------------------------------|------------------------------------|---------------------------------------|--------------------------|
| Targets | 16            | <i>All</i>                                                     | <i>some</i>                        | 4 out of 4                            | True but infelicitous    |
|         | 16            | <i>Any</i>                                                     | <i>some</i>                        | 4 out of 4                            | True and felicitous      |
| Fillers | 16            | 16 <i>all</i> and 16 <i>any</i> , balanced across truth values | <i>only some</i>                   | 2 out of 4                            | True and felicitous      |
|         | 8             |                                                                | <i>only some</i>                   | 4 out of 4                            | False and infelicitous   |
|         | 8             |                                                                | <i>only some</i>                   | 0 out of 4                            | False and infelicitous   |
